# Supplementary material for: A three-dimensional energetic coordination compound (BLG-1) with excellent initiating ability for lead-free primary explosives
Source: Royal Society of Chemistry journal article supplement (doi:10.1039/d3mh01410j), 2023-01-01
Supplement: d3mh01410j1.pdf [file d3mh01410j1.pdf]

## Supporting Information

### **A Three-Dimensional Energetic Coordination Compound (BLG-1) with Super Initiating Ability for Lead-free Primary Explosive**

Guorong Lei, Wenchuan Cheng, Zujia Lu, Tonglai Zhang, Zhimin Li\* and Jianguo Zhang\*

*State Key Laboratory of Explosion Science and Technology*

*Beijing Institute of Technology, Beijing 100081, China*

*\*Corresponding Authors: lizm@bit.edu.cn; zjgbit@bit.edu.cn*

**Table S1.** Crystal data and structure refinement details of BLG-1.

| Compound                                | BLG-1                                                                         |
|-----------------------------------------|-------------------------------------------------------------------------------|
| Empirical formula                       | C <sub>4</sub> H <sub>4</sub> Br <sub>2</sub> CuN <sub>8</sub> O <sub>6</sub> |
| Formula weight                          | 483.51                                                                        |
| Temperature / K                         | 298K                                                                          |
| Crystal system                          | monoclinic                                                                    |
| Space group                             | <i>P</i> 2 <sub>1</sub> / <i>c</i>                                            |
| <i>a</i> / Å                            | 9.3556(9)                                                                     |
| <i>b</i> / Å                            | 6.8168(7)                                                                     |
| <i>c</i> / Å                            | 9.3773(8)                                                                     |
| β/ degree                               | 93.497(2)                                                                     |
| Volume / Å <sup>3</sup>                 | 596.93(10)                                                                    |
| Z                                       | 2                                                                             |
| ρ <sub>calc</sub> / mg mm <sup>-3</sup> | 2.690                                                                         |
| μ / mm <sup>-1</sup>                    | 0.857                                                                         |
| F(000)                                  | 462                                                                           |
| Crystal size / mm <sup>3</sup>          | 0.18 × 0.11 × 0.07                                                            |
| 2θ range for data collection            | 2.18 to 25.01°                                                                |
| Limiting indices                        | -10 ≤ h ≤ 11, -8 ≤ k ≤ 7, -<br>8 ≤ l ≤ 11                                     |
| Reflections collected                   | 2734                                                                          |
| Independent reflections                 | 1055[R(int) = 0.0628]                                                         |
| Completeness to theta = 25.01           | 99.9 %                                                                        |
| Data/restraints/parameters              | 1055/0/98                                                                     |
| Goodness-of-fit on F <sup>2</sup>       | 1.030                                                                         |
| Final R indexes [I > 2σ (I)]            | R1 = 0.0402, wR2 = 0.0969                                                     |
| Final R indexes [all data]              | R1 = 0.0428, wR2 = 0.0984                                                     |

**Table S2.** Selected bond lengths (Å) of BLG-1.

| Bond    | Length/Å | Bond   | Length/Å |
|---------|----------|--------|----------|
| Cu1-N1  | 1.980(4) | N2-C1  | 1.297(6) |
| Cu1-N11 | 1.980(4) | N3-C2  | 1.366(6) |
| Cu1-O1  | 2.025(3) | N3-C1  | 1.378(6) |
| Cu1-O11 | 2.025(3) | N3-N41 | 1.382(5) |
| Cu1-O2  | 2.333(3) | N4-N41 | 1.253(7) |
| Cu1-O21 | 2.333(3) | O2-Cu1 | 0.9300   |
| Br1-O3  | 1.633(3) | C1-H1  | 0.9300   |
| Br1-O1  | 1.646(3) | N3-N41 | 1.382(5) |
| Br1-O2  | 1.691(3) | N4-N41 | 1.253(7) |
| N1-C2   | 1.297(6) | O2-Cu1 | 0.9300   |
| N1-N2   | 1.402(5) | C1-H1  | 0.9300   |

**Table S3.** Selected angles (°) of BLG-1.

| Bond Angle   | Angle/°    | Bond Angle  | Angle/°    |
|--------------|------------|-------------|------------|
| N1-Cu1-N11   | 180        | O1-Br1-O2   | 100.53(16) |
| N1-Cu1-O21   | 91.57(14)  | C2-N1-N2    | 109.4(3)   |
| N1#1-Cu1-O21 | 88.43(14)  | C2-N1-Cu1   | 129.2(3)   |
| N1-Cu1-O21   | 88.43(14)  | N2-N1-Cu1   | 121.3(3)   |
| N11-Cu1-O21  | 91.57(14)  | C1-N2-N1    | 106.3(4)   |
| O21-Cu1-O21  | 180        | C2-N3-C1    | 106.5(4)   |
| N1-Cu1-O1    | 90.35(15)  | C2-N3-N4    | 122.2(4)   |
| N11-Cu1-O1   | 89.65(15)  | C1-N3-N4    | 130.8(4)   |
| O21-Cu1-O1   | 92.77(11)  | N41-N4-N3   | 110.2(5)   |
| O21-Cu1-O1   | 87.23(11)  | Br1-O1-Cu1  | 112.73(16) |
| N1-Cu1-O11   | 89.65(15)  | Br1-O2-Cu11 | 120.52(17) |
| N11-Cu1-O11  | 90.35(15)  | N2-C1-N3    | 109.7(4)   |
| O21-Cu1-O11  | 87.23(11)  | N2-C1-H1    | 125.2      |
| O23-Cu1-O11  | 92.77(11)  | N3-C1-H1    | 125.2      |
| O1-Cu1-O11   | 180        | N1-C2-N3    | 108.1(4)   |
| O3-Br1-O1    | 106.31(17) | N1-C2-H2    | 126        |
| O3-Br1-O2    | 105.12(18) | N3-C2-H2    | 126        |

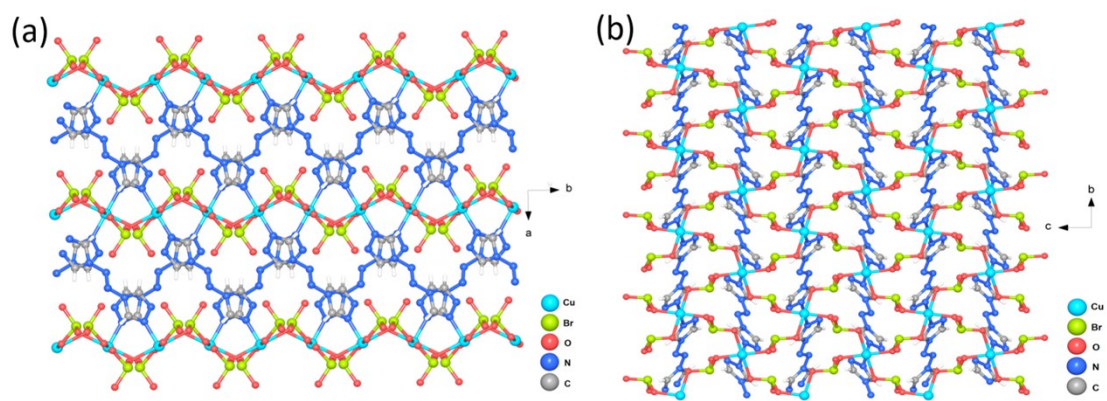

**Figure S1.** The crystal stacking structure of BLG-1 viewed from (a)  $a$ -axis and (b)  $c$ -axis.

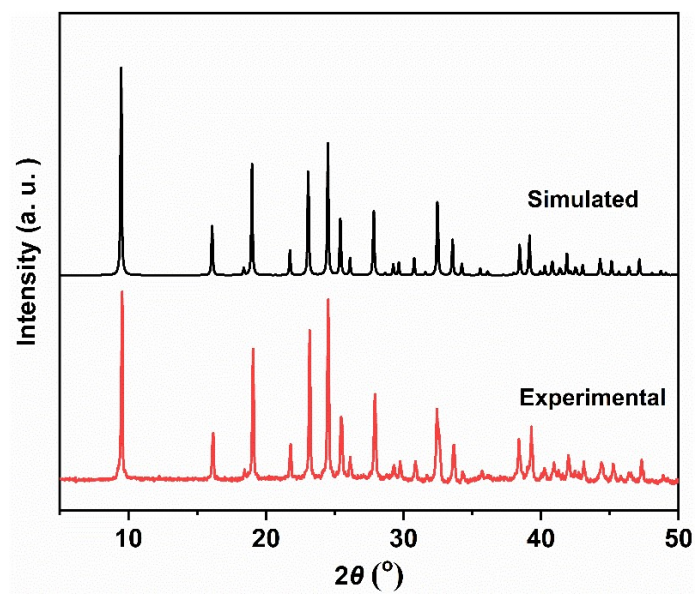

**Figure S2.** The simulated and experimental XRD patterns of BLG-1.

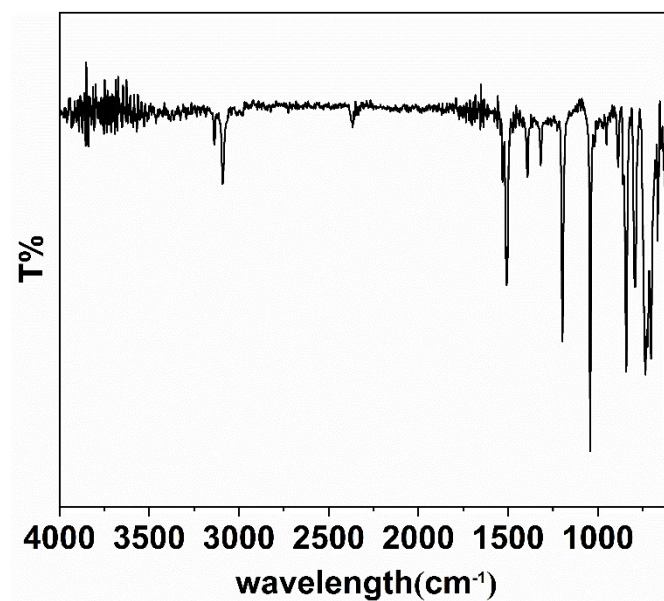

**Figure S3.** The FT-IR spectrum of BLG-1.

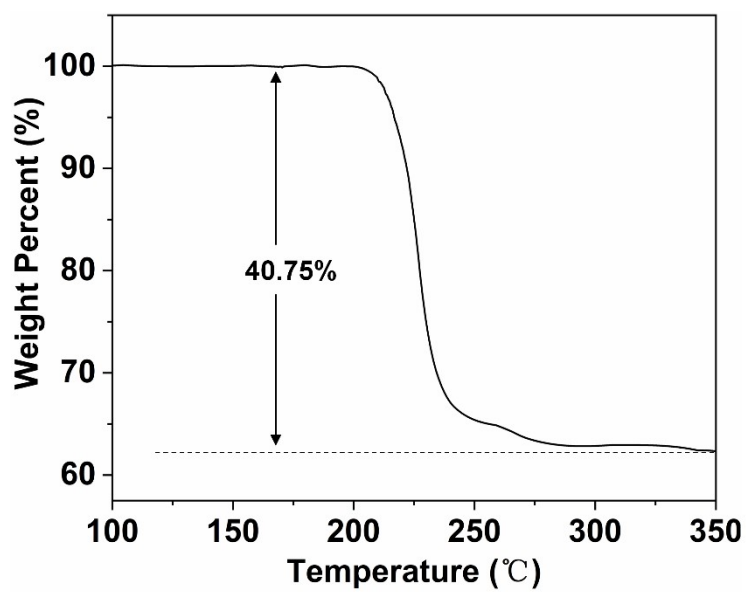

**Figure S4.** The TG curve of BLG-1 with a heating rate of 5 °C min<sup>-1</sup>.

## Non-isothermal kinetics

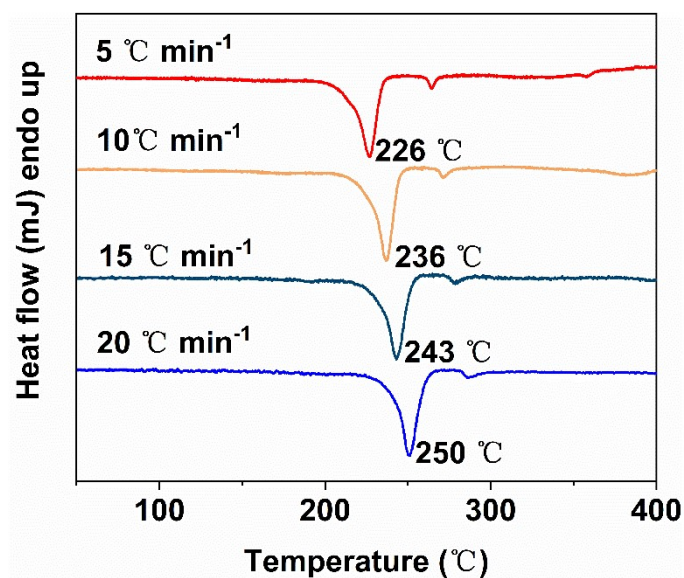

**Figure S5.** The DSC curve of BLG-1 at different heating rates.

The thermodynamic parameters of BLG-1 were calculated using the Kissinger equation presented below.

$$\ln\left(\frac{\beta}{T_p^2}\right) = \ln\frac{AR}{E_a} - \frac{E_a}{R} \frac{1}{T_p}$$

In the equation,  $E_a$ ,  $T_p$ ,  $\beta$ , and  $R$  correspond to the activation energy (kJ mol<sup>-1</sup>), decomposition temperature peak (K), heating rate (K min<sup>-1</sup>), and ideal gas constant (8.314 J mol<sup>-1</sup> K<sup>-1</sup>), respectively. The calculated  $E_a$  is 118.2 kJ mol<sup>-1</sup> for BLG-1.

## Formation enthalpy

The constant-volume combustion energy ( $\Delta_c U = -2842.98 \text{ kJ mol}^{-1}$ ) for BLG-1 was obtained using an oxygen bomb calorimeter calibrated with standard sample benzoic acid. The standard molar combustion enthalpy ( $\Delta_c H_m^\theta$ ) and standard heat of formation enthalpy ( $\Delta_f H_m^\theta$ ) were calculated based on equations (1) and (2), respectively. The  $\Delta_f H_m^\theta$  for copper(II) bromide, carbon dioxide, and water are  $\Delta_f H_m^\theta(\text{CuBr}_2, \text{s}) = 143 \text{ kJ mol}^{-1}$ ,  $\Delta_f H_m^\theta(\text{CO}_2, \text{g}) = -393.51 \text{ kJ mol}^{-1}$ ,  $\Delta_f H_m^\theta(\text{H}_2\text{O}, \text{l}) = -285.83 \text{ kJ mol}^{-1}$ .

$$\Delta_c H_m^\theta = \Delta_c U + \Delta n RT \quad (1)$$

$$\Delta n = n_g(\text{products}) - n_g(\text{reactants})$$

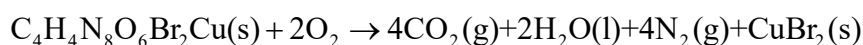

$$\Delta_f H_m^\theta(\text{compound}) = \sum \Delta_f H_m^\theta(\text{products}) - \Delta_c H_m^\theta(\text{compound}) \quad (2)$$

The calculation results:

$$\Delta n = 4 + 4 - 2 = 6$$

$$\Delta_c H_m^\theta(\text{BLG-1}) = -2842.98 + 6 \times 8.314 \times 298.15 \times 10^{-3} = -2828.11 \text{ kJ mol}^{-1}$$

$$\Delta_f H_m^\theta(\text{BLG-1}) = 4 \times (-393.51) + 2 \times (-285.83) + (-143) - (-2828.11) = 539.41 \text{ kJ mol}^{-1}$$



### The laser ignition test

In the test, a single-pulse semiconductor laser device was used as a laser source, and energy ( $E$ , mJ), delay time ( $t$ , ms), and output power ( $P$ , W) were used as evaluation indicators. 20mg of BLG-1 was pressed into the percussion cap with a static pressure of 49 MPa. The results showed that BLG-1 can be detonated under the conditions of  $t=1\text{ms}$  and  $P=13\text{W}$ .

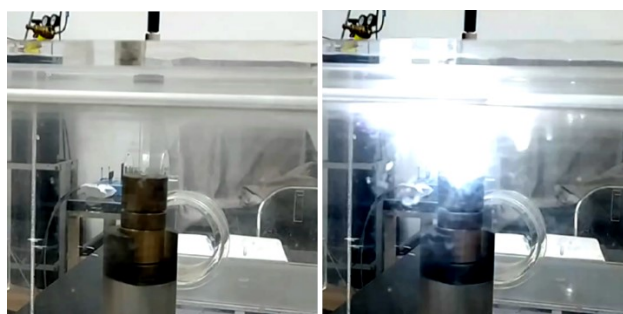

**Figure S6.** The detonation of BLG-1 with a laser irradiation ( $P=13\text{W}$ ,  $t=1\text{ms}$ ,  $E=13\text{mJ}$ ).

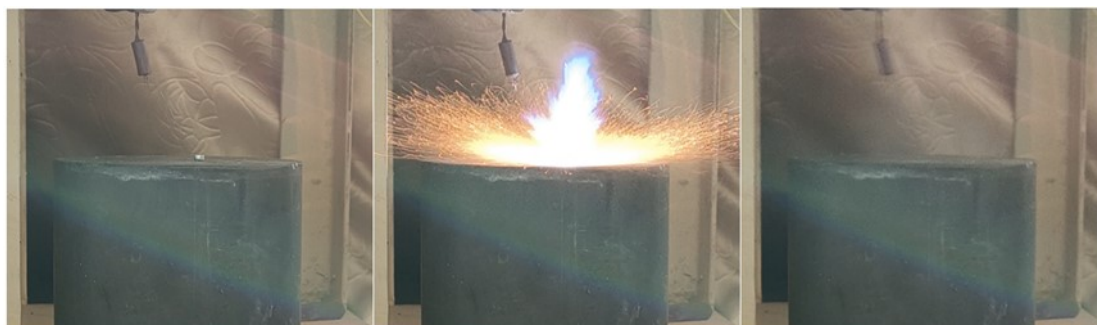

**Figure S7.** The detonation of 10 mg of BLG-1 in an aluminum crucible.

### The initiation test for single charge of BLG-1

In order to evaluate the feasibility of BLG-1 as a single charge of detonator, the initiating ability of the single charge of BLG-1 was tested. In the test, a certain amount of BLG-1 was pressed into the detonator cap with a static pressure of 49 MPa. The results showed that 70mg of BLG-1 could reliably blast out the lead plate with a bore diameter of 7.5mm. When the charge amount was reduced to 40mg, the bore diameter of the hole was reduced to 5.7mm. When the charge amount was reduced to 30mg, BLG-1 failed to blast out the lead plate.

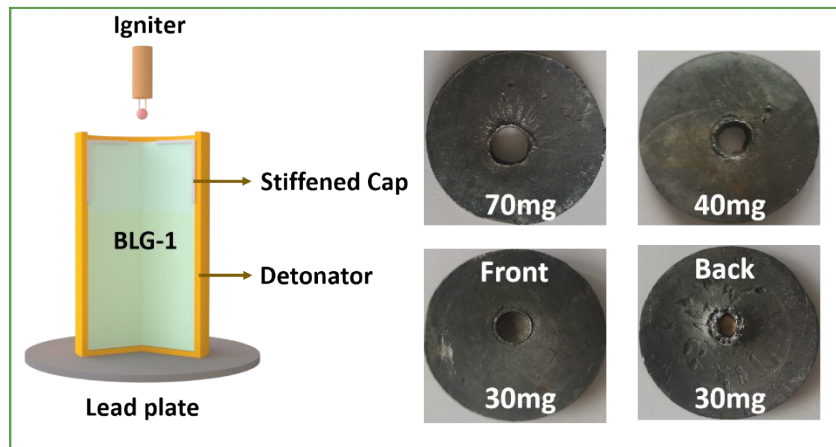

**Figure S8.** The initiation ability test setup and results.

**Table S4.** The initiating ability and crystal density of BLG-1 and current reported primary explosives.

| Compound             | Density (g cm <sup>-3</sup> ) | MPC (mg) | V <sub>(MPC)</sub> (1x10 <sup>-3</sup> cm <sup>3</sup> ) | Ref.             |
|----------------------|-------------------------------|----------|----------------------------------------------------------|------------------|
| <b>BLG-1</b>         | <b>2.69</b>                   | <b>3</b> | <b>1.12</b>                                              | <b>This work</b> |
| K <sub>2</sub> DNABT | 2.17                          | 40       | 18.4                                                     | [1]              |
| DBX-1                | 2.58                          | 20       | 7.74                                                     | [2]              |
| LA                   | 4.8                           | 20       | 4.17                                                     | [2]              |
| CMA-2                | 2.07                          | 10       | 4.83                                                     | [3]              |
| CAM                  | 2.02                          | 5        | 2.48                                                     | [4]              |
| ICM-103              | 1.86                          | 60       | 32.28                                                    | [5]              |
| ANTP                 | 1.82                          | 40       | 21.96                                                    | [6]              |
| BDTT                 | 1.76                          | 60       | 34.08                                                    | [7]              |
| CMA                  | 2.10                          | 15       | 7.13                                                     | [8]              |
| CIA                  | 2.09                          | 50       | 23.9                                                     | [8]              |
| NH <sub>4</sub> CuNT | 2                             | 25       | 12.5                                                     | [9]              |
| NH <sub>4</sub> FeNT | 2.2                           | 25       | 11.35                                                    | [9]              |

## Reference

1. D. Fischer, T. M. Klapçtke and J. Stierstorfer, *Angewandte Chemie International Edition*, 2014, **53**, 8172–8175.
2. J. W. Fronabarger, M. D. Williams, W. B. Sanborn, J. G. Bragg, D. A. Parrish and M. Bichay, *Propellants, Explosives, Pyrotechnics*, 2011, **36**, 541-550.
3. Y. Feng, S. Chen, Z. Li and T. Zhang, *Chemical Engineering Journal*, 2022, **429**, 132186.
4. M. H. H. Wurzenberger, M. Lommel, M. S. Gruhne, N. Szimhardt and J. Stierstorfer, *Angewandte Chemie International Edition*, 2020, **59**, 12367-12370.
5. M. Deng, Y. Feng, W. Zhang, X. Qi and Q. Zhang, *Nature*, 2019, **10**, 1339.
6. W. Huang, Y. Tang, G. H. Imler, D. A. Parrish and J. n. M. Shreeve, *Journal of the American Chemical Society*, 2020, **142**, 3652-3657.
7. D. Chen, H. Yang, Z. Yi, H. Xiong, L. Zhang, S. Zhu and G. Cheng, *Angewandte Chemie International Edition*, 2018, **57**, 2081-2084.

8. H. Li, Y. Wang, Z. Wei, X. Yang, L. Liang, L. Xia, M. Long, Z. Li and T. Zhang, *Chemical Engineering Journal*, 2022, **430**, 132739.
9. M. H. V. Huynh, M. A. Hiskey, T. J. Meyer and M. Wetzler, *Proceedings of the National Academy of Sciences*, 2006, **103**, 5409-5412.
